# Supplementary material for: Strip thickness prediction method based on improved border collie optimizing LSTM
Source: PeerJ Comput Sci. 2022 Oct 25;8:e1114. doi: 10.7717/peerj-cs.1114 (PMC9680871; doi:10.7717/peerj-cs.1114)
Supplement: Supplemental Information 1 — Each row in the data set includes four characteristic parameters of rolling force, roll gap, rolling speed and click power, and the predicted target strip thickness. [file peerj-cs-08-1114-s001.xlsx]

## Sheet: Sheet1
time	F9_F	F9_GAP	F9_SPD_ACT	F9_CURRENT_ACT	ABS_H
20.09.2012 01:21:51.900000	1129.64	2.21199	11.0067	40.8867	1.7469
20.09.2012 01:21:51.910000	1121.98	2.21107	10.99	43.265	1.76015
20.09.2012 01:21:51.920000	1111.06	2.21099	10.98	45.0367	1.77723
20.09.2012 01:21:51.930000	1094.78	2.21032	10.98	45.89	1.78235
20.09.2012 01:21:51.940000	1093.46	2.20832	10.9733	46.17	1.78818
20.09.2012 01:21:51.950000	1060.18	2.20782	10.97	46.31	1.79019
20.09.2012 01:21:51.960000	1076.98	2.20849	10.9633	47.62	1.78985
20.09.2012 01:21:51.970000	1076.72	2.20982	10.96	48.73	1.78649
20.09.2012 01:21:51.980000	1085.33	2.21049	10.9567	49.4067	1.78365
20.09.2012 01:21:51.990000	1104.1	2.21132	10.95	50.76	1.77927
20.09.2012 01:21:52.000000	1089.45	2.21032	10.94	51.4	1.77609
20.09.2012 01:21:52.010000	1093.24	2.21032	10.95	52.45	1.77482
20.09.2012 01:21:52.020000	1096.13	2.20932	10.95	52.83	1.77475
20.09.2012 01:21:52.030000	1088.92	2.20932	10.95	53.02	1.77479
20.09.2012 01:21:52.040000	1082.81	2.21032	10.95	53.15	1.7746
20.09.2012 01:21:52.050000	1096.57	2.21032	10.95	53.15	1.7746
20.09.2012 01:21:52.060000	1080.51	2.21032	10.9633	52.65	1.7758
20.09.2012 01:21:52.070000	1082.37	2.21032	10.97	52.33	1.78077
20.09.2012 01:21:52.080000	1084.15	2.20899	10.97	51.9233	1.78308
20.09.2012 01:21:52.090000	1092.25	2.20957	10.97	51.25	1.78877
20.09.2012 01:21:52.100000	1095.61	2.21016	10.97	50.9067	1.79193
20.09.2012 01:21:52.110000	1094.23	2.21082	10.97	51.16	1.79598
20.09.2012 01:21:52.120000	1101.44	2.21182	10.97	51.68	1.7985
20.09.2012 01:21:52.130000	1132.74	2.21232	10.97	51.68	1.79942
20.09.2012 01:21:52.140000	1127.04	2.21365	10.97	52.51	1.79838
20.09.2012 01:21:52.150000	1131.52	2.21382	10.965	52.77	1.7974
20.09.2012 01:21:52.160000	1113.79	2.21116	10.97	53.63	1.79661
20.09.2012 01:21:52.170000	1117.63	2.20982	10.97	53.63	1.79703
20.09.2012 01:21:52.180000	1088.74	2.20882	10.97	53.23	1.79708
20.09.2012 01:21:52.190000	1101.9	2.20832	10.97	52.895	1.7985
20.09.2012 01:21:52.200000	1088.96	2.20816	10.9767	53.04	1.79875
20.09.2012 01:21:52.210000	1071.94	2.20782	10.98	53.28	1.79804
20.09.2012 01:21:52.220000	1073.43	2.20882	10.98	52.46	1.79761
20.09.2012 01:21:52.230000	1086.8	2.20932	10.98	52.51	1.79659
20.09.2012 01:21:52.240000	1098.56	2.20982	10.98	52.51	1.79485
20.09.2012 01:21:52.250000	1094.68	2.21082	10.99	52.145	1.79256
20.09.2012 01:21:52.260000	1102.04	2.21049	10.99	52.12	1.79062
20.09.2012 01:21:52.270000	1108.11	2.21182	10.99	51.885	1.78954
20.09.2012 01:21:52.280000	1133.77	2.21266	10.99	51.65	1.78727
20.09.2012 01:21:52.290000	1114.09	2.21232	10.99	51.7	1.78642
20.09.2012 01:21:52.300000	1125.7	2.21166	10.9833	52.0667	1.78308
20.09.2012 01:21:52.310000	1100.34	2.21082	10.98	52.93	1.78016
20.09.2012 01:21:52.320000	1103.23	2.21032	10.98	52.7133	1.78147
20.09.2012 01:21:52.330000	1095.34	2.20882	10.98	52.28	1.78494
20.09.2012 01:21:52.340000	1103.3	2.20832	10.9833	52.38	1.78781
20.09.2012 01:21:52.350000	1052.63	2.20732	10.99	51.97	1.79242
20.09.2012 01:21:52.360000	1069.71	2.20732	10.99	51.97	1.79405
20.09.2012 01:21:52.370000	1071.94	2.20832	10.99	51.42	1.79787
20.09.2012 01:21:52.380000	1064.32	2.20916	10.9967	50.9267	1.80158
20.09.2012 01:21:52.390000	1111.89	2.21132	11	50.68	1.8033
20.09.2012 01:21:52.400000	1112.47	2.21232	10.9967	50.8367	1.80552
20.09.2012 01:21:52.410000	1127.96	2.21407	10.99	50.99	1.80618
20.09.2012 01:21:52.420000	1155.29	2.21499	10.99	51.0033	1.80466
20.09.2012 01:21:52.430000	1165.34	2.21532	10.99	51.03	1.80155
20.09.2012 01:21:52.440000	1147.36	2.21382	10.99	51.2033	1.80069
20.09.2012 01:21:52.450000	1128.95	2.21107	11	51.12	1.80056
20.09.2012 01:21:52.460000	1122.23	2.20882	11	50.7533	1.80185
20.09.2012 01:21:52.470000	1107.11	2.20807	11	50.02	1.80245
20.09.2012 01:21:52.480000	1083.92	2.20732	11.01	50.02	1.80247
20.09.2012 01:21:52.490000	1055.07	2.20632	11.01	50.02	1.80321
20.09.2012 01:21:52.500000	1057.73	2.20616	11.01	48.71	1.80343
20.09.2012 01:21:52.510000	1080.59	2.20682	11.01	48.35	1.80347
20.09.2012 01:21:52.520000	1065.36	2.20816	11.01	48.0767	1.80336
20.09.2012 01:21:52.530000	1076.38	2.21032	11.01	47.94	1.80305
20.09.2012 01:21:52.540000	1091.17	2.21116	11.01	48.2533	1.80112
20.09.2012 01:21:52.550000	1146.5	2.21532	11.01	47.88	1.79826
20.09.2012 01:21:52.560000	1118.53	2.21532	11.01	47.88	1.79703
20.09.2012 01:21:52.570000	1139.5	2.21507	11.005	48.185	1.79781
20.09.2012 01:21:52.580000	1136.42	2.21465	11	48.49	1.80011
20.09.2012 01:21:52.590000	1142.04	2.21382	11	48.57	1.80337
20.09.2012 01:21:52.600000	1142.19	2.21216	11.01	48.35	1.80674
20.09.2012 01:21:52.610000	1139.39	2.21182	11.01	48.35	1.81008
20.09.2012 01:21:52.620000	1105.96	2.20882	11.01	47.89	1.81754
20.09.2012 01:21:52.630000	1085.47	2.20682	11.01	47.795	1.8179
20.09.2012 01:21:52.640000	1075.56	2.20616	11.0133	47.33	1.8169
20.09.2012 01:21:52.650000	1078.72	2.20657	11.02	46.59	1.81636
20.09.2012 01:21:52.660000	1069.74	2.20699	11.03	45.25	1.816
20.09.2012 01:21:52.670000	1057.95	2.20882	11.03	44.48	1.81415
20.09.2012 01:21:52.680000	1086.58	2.20982	11.03	44.48	1.81323
20.09.2012 01:21:52.690000	1091.67	2.21157	11.015	44.95	1.81258
20.09.2012 01:21:52.700000	1131.32	2.21365	11.01	45.51	1.81096
20.09.2012 01:21:52.710000	1145.04	2.21432	11.005	45.605	1.80806
20.09.2012 01:21:52.720000	1159.79	2.21349	11	45.7	1.80477
20.09.2012 01:21:52.730000	1145.14	2.21282	11	46.92	1.80189
20.09.2012 01:21:52.740000	1175.78	2.21082	11	46.8333	1.7997
20.09.2012 01:21:52.750000	1125.63	2.20682	11	46.955	1.79913
20.09.2012 01:21:52.760000	1123.04	2.20482	11.0033	46.8233	1.80053
20.09.2012 01:21:52.770000	1106.11	2.20107	11.01	46.23	1.80181
20.09.2012 01:21:52.780000	1105.75	2.20032	11.01	46.0033	1.80361
20.09.2012 01:21:52.790000	1074.39	2.19932	11.01	45.07	1.80332
20.09.2012 01:21:52.800000	1097.9	2.19982	11.01	45.07	1.80209
20.09.2012 01:21:52.810000	1081.8	2.20007	11.01	45.25	1.79938
20.09.2012 01:21:52.820000	1103.06	2.20032	11.0067	45.3433	1.79733
20.09.2012 01:21:52.830000	1115.88	2.20257	11	45.53	1.79544
20.09.2012 01:21:52.840000	1153.22	2.20516	11	45.78	1.79316
20.09.2012 01:21:52.850000	1158.25	2.20582	11	45.83	1.7925
20.09.2012 01:21:52.860000	1164.59	2.20532	11	45.8033	1.7916
20.09.2012 01:21:52.870000	1176.2	2.20382	11	45.79	1.79175
20.09.2012 01:21:52.880000	1179.91	2.20332	11	45.49	1.79409
20.09.2012 01:21:52.890000	1180.22	2.20207	11	45.23	1.79836
20.09.2012 01:21:52.900000	1178.66	2.20082	11.0033	45.2333	1.80122
20.09.2012 01:21:52.910000	1149.81	2.19732	11.01	45.24	1.8068
20.09.2012 01:21:52.920000	1113.41	2.19532	11.01	44.7933	1.80911
20.09.2012 01:21:52.930000	1095.68	2.19332	11.01	44.515	1.80888
20.09.2012 01:21:52.940000	1084.46	2.19316	11.0133	44.3367	1.80882
20.09.2012 01:21:52.950000	1086.27	2.19332	11.02	44.09	1.80749
20.09.2012 01:21:52.960000	1103.08	2.19532	11.02	43.23	1.80122
20.09.2012 01:21:52.970000	1111.65	2.19632	11.02	43.23	1.79812
20.09.2012 01:21:52.980000	1155.13	2.19999	11.01	42.53	1.789
20.09.2012 01:21:52.990000	1187.97	2.20132	11	44.07	1.78386
20.09.2012 01:21:53.000000	1184.13	2.20099	10.9933	44.2633	1.78218
20.09.2012 01:21:53.010000	1209.94	2.19982	10.99	45.11	1.78241
20.09.2012 01:21:53.020000	1208.62	2.19865	10.99	45.86	1.7847
20.09.2012 01:21:53.030000	1183.65	2.19557	10.99	45.72	1.78805
20.09.2012 01:21:53.040000	1160.46	2.19282	10.99	45.98	1.79256
20.09.2012 01:21:53.050000	1175.56	2.19132	10.99	45.98	1.79553
20.09.2012 01:21:53.060000	1104.32	2.18649	11	45.07	1.80184
20.09.2012 01:21:53.070000	1095.9	2.18557	10.995	45.095	1.8042
20.09.2012 01:21:53.080000	1092.29	2.18482	10.9967	44.92	1.80728
20.09.2012 01:21:53.090000	1093.47	2.18482	11.01	44.52	1.80841
20.09.2012 01:21:53.100000	1087.47	2.18565	11.02	43.66	1.80576
20.09.2012 01:21:53.110000	1098.99	2.18732	11.03	40.95	1.80031
20.09.2012 01:21:53.120000	1127.84	2.18899	11.03	40.95	1.79717
20.09.2012 01:21:53.130000	1157.8	2.19232	11.035	38.15	1.7902
20.09.2012 01:21:53.140000	1168.38	2.19282	11.03	37.88	1.78653
20.09.2012 01:21:53.150000	1197.62	2.19282	11.025	38.055	1.78183
20.09.2012 01:21:53.160000	1229.25	2.19282	11.02	38.23	1.77926
20.09.2012 01:21:53.170000	1225.04	2.19282	11.01	40.24	1.77893
20.09.2012 01:21:53.180000	1198.98	2.18949	11.0033	40.8533	1.7868
20.09.2012 01:21:53.190000	1178.65	2.18757	10.995	41.83	1.79067
20.09.2012 01:21:53.200000	1150.41	2.18366	10.99	42.6533	1.79834
20.09.2012 01:21:53.210000	1129.19	2.18182	10.99	42.96	1.80306
20.09.2012 01:21:53.220000	1131.57	2.18166	10.99	43.0767	1.80505
20.09.2012 01:21:53.230000	1080.81	2.18082	11.01	41.5	1.80586
20.09.2012 01:21:53.240000	1101.22	2.18082	11.01	41.5	1.80509
20.09.2012 01:21:53.250000	1116.98	2.18282	11.01	40.23	1.8028
20.09.2012 01:21:53.260000	1127.41	2.18449	11.01	40.2567	1.79894
20.09.2012 01:21:53.270000	1139.51	2.18632	11.005	40.39	1.79247
20.09.2012 01:21:53.280000	1197.74	2.18732	11	40.47	1.78451
20.09.2012 01:21:53.290000	1169.32	2.18782	10.99	42.17	1.77864
20.09.2012 01:21:53.300000	1197.51	2.18666	10.9833	42.35	1.77329
20.09.2012 01:21:53.310000	1218.82	2.18657	10.98	42.44	1.77217
20.09.2012 01:21:53.320000	1213.13	2.18466	10.98	44.03	1.77314
20.09.2012 01:21:53.330000	1198.41	2.18282	10.98	44.98	1.77478
20.09.2012 01:21:53.340000	1188.42	2.18016	10.98	44.99	1.77889
20.09.2012 01:21:53.350000	1178.22	2.17782	10.98	45.01	1.78662
20.09.2012 01:21:53.360000	1162.17	2.17699	10.9867	44.44	1.79065
20.09.2012 01:21:53.370000	1130.84	2.17532	10.99	43.77	1.79663
20.09.2012 01:21:53.380000	1117.71	2.17416	10.9933	43.35	1.79936
20.09.2012 01:21:53.390000	1114.55	2.17482	11	42.51	1.80016
20.09.2012 01:21:53.400000	1142.07	2.17682	11	41.97	1.79752
20.09.2012 01:21:53.410000	1168.69	2.17907	11	41.94	1.79372
20.09.2012 01:21:53.420000	1169.34	2.18015	10.9933	41.8367	1.78876
20.09.2012 01:21:53.430000	1178.75	2.18082	10.99	41.8	1.78565
20.09.2012 01:21:53.440000	1232.14	2.18416	10.99	41.78	1.78177
20.09.2012 01:21:53.450000	1257.89	2.18482	10.99	41.78	1.7811
20.09.2012 01:21:53.460000	1246.91	2.18399	10.9933	43.5133	1.78038
20.09.2012 01:21:53.470000	1251.63	2.18082	11	43.18	1.78176
20.09.2012 01:21:53.480000	1233.9	2.17882	11	42.78	1.78385
20.09.2012 01:21:53.490000	1193.32	2.17532	11	41.72	1.79081
20.09.2012 01:21:53.500000	1191.11	2.17416	11	40.86	1.79369
20.09.2012 01:21:53.510000	1161.14	2.17182	11	40.97	1.79727
20.09.2012 01:21:53.520000	1132.05	2.16882	11.01	40.7	1.80014
20.09.2012 01:21:53.530000	1113.88	2.16832	11.01	40.7	1.79969
20.09.2012 01:21:53.540000	1108.78	2.16966	11.01	40.64	1.79926
20.09.2012 01:21:53.550000	1118	2.17107	11.005	40.6	1.79685
20.09.2012 01:21:53.560000	1140.8	2.17349	11.0067	40.5133	1.78937
20.09.2012 01:21:53.570000	1139.6	2.17482	11.01	40.49	1.78412
20.09.2012 01:21:53.580000	1164.74	2.17549	11.01	39.73	1.77506
20.09.2012 01:21:53.590000	1193.96	2.17682	11	39.56	1.76866
20.09.2012 01:21:53.600000	1219.5	2.17682	11	39.56	1.76726
20.09.2012 01:21:53.610000	1220.71	2.17507	11	40.095	1.77034
20.09.2012 01:21:53.620000	1206.53	2.17332	11	40.16	1.77378
20.09.2012 01:21:53.630000	1206.61	2.17282	10.995	40.16	1.77859
20.09.2012 01:21:53.640000	1207.58	2.17099	10.99	40.16	1.78632
20.09.2012 01:21:53.650000	1213.06	2.17032	10.99	41.26	1.79033
20.09.2012 01:21:53.660000	1166.09	2.16766	10.9967	41.32	1.79515
20.09.2012 01:21:53.670000	1179.34	2.16582	10.995	41.14	1.79747
20.09.2012 01:21:53.680000	1171.06	2.16599	10.9933	40.8633	1.79881
20.09.2012 01:21:53.690000	1181.68	2.16657	11	40.73	1.79782
20.09.2012 01:21:53.700000	1184.96	2.16682	11.0033	40.7367	1.79248
20.09.2012 01:21:53.710000	1193.52	2.16832	11	38.96	1.78609
20.09.2012 01:21:53.720000	1235.25	2.17132	11	38.96	1.78389
20.09.2012 01:21:53.730000	1219.48	2.17082	11	39.81	1.78252
20.09.2012 01:21:53.740000	1241.96	2.17066	10.9967	40.08	1.78336
20.09.2012 01:21:53.750000	1234.46	2.17007	10.99	40.62	1.78443
20.09.2012 01:21:53.760000	1222.74	2.16699	10.99	41.2	1.7865
20.09.2012 01:21:53.770000	1208.39	2.16632	10.98	42.07	1.7888
20.09.2012 01:21:53.780000	1209.73	2.16516	10.98	42.6633	1.79378
20.09.2012 01:21:53.790000	1224.14	2.16382	10.98	42.96	1.79502
20.09.2012 01:21:53.800000	1210.23	2.16299	10.9833	42.7033	1.79366
20.09.2012 01:21:53.810000	1205.29	2.16232	10.99	42.29	1.79096
20.09.2012 01:21:53.820000	1197.3	2.16232	10.99	42.2533	1.78722
20.09.2012 01:21:53.830000	1221.27	2.16282	10.99	42.18	1.78014
20.09.2012 01:21:53.840000	1193.96	2.16232	10.9967	41.24	1.77548
20.09.2012 01:21:53.850000	1214.71	2.16232	11	40.71	1.7716
20.09.2012 01:21:53.860000	1224	2.16332	10.9933	40.7833	1.76794
20.09.2012 01:21:53.870000	1237.91	2.16357	10.98	41.05	1.76648
20.09.2012 01:21:53.880000	1228.72	2.16266	10.98	42.5	1.76542
20.09.2012 01:21:53.890000	1256.09	2.16232	10.98	42.5	1.76609
20.09.2012 01:21:53.900000	1239.68	2.16082	10.98	43.9633	1.77206
20.09.2012 01:21:53.910000	1252.77	2.16082	10.98	44.09	1.77839
20.09.2012 01:21:53.920000	1242.71	2.15966	10.98	43.8633	1.78366
20.09.2012 01:21:53.930000	1227.02	2.15832	10.98	43.75	1.78812
20.09.2012 01:21:53.940000	1229.01	2.15716	10.98	44.44	1.79209
20.09.2012 01:21:53.950000	1183.98	2.15432	10.99	43.8	1.79664
20.09.2012 01:21:53.960000	1193.09	2.15332	10.99	43.1667	1.79741
20.09.2012 01:21:53.970000	1193.66	2.15432	10.995	42.645	1.7959
20.09.2012 01:21:53.980000	1213.3	2.15549	11	42.44	1.79368
20.09.2012 01:21:53.990000	1204.84	2.15607	11.01	41.345	1.78883
20.09.2012 01:21:54.000000	1243.97	2.15982	11.03	37.43	1.78042
20.09.2012 01:21:54.010000	1230.78	2.15882	11.03	37.43	1.7777
20.09.2012 01:21:54.020000	1251.14	2.15899	11.03	36.98	1.77166
20.09.2012 01:21:54.030000	1258.55	2.15782	11.025	36.7	1.76987
20.09.2012 01:21:54.040000	1240.72	2.15666	11.0133	36.96	1.76934
20.09.2012 01:21:54.050000	1236.58	2.15607	11	38.04	1.77221
20.09.2012 01:21:54.060000	1218.01	2.15549	11	39.4	1.77548
20.09.2012 01:21:54.070000	1227.03	2.15432	10.99	40.11	1.78234
20.09.2012 01:21:54.080000	1208.84	2.15432	10.99	40.11	1.78846
20.09.2012 01:21:54.090000	1206.28	2.15282	10.99	40.36	1.79513
20.09.2012 01:21:54.100000	1217.34	2.15349	10.99	40.6033	1.79676
20.09.2012 01:21:54.110000	1243.56	2.15382	10.99	40.825	1.79653
20.09.2012 01:21:54.120000	1256.16	2.15399	10.99	40.56	1.79263
20.09.2012 01:21:54.130000	1250.98	2.15332	10.99	40.91	1.79115
20.09.2012 01:21:54.140000	1290.42	2.15349	10.99	40.5833	1.7843
20.09.2012 01:21:54.150000	1266.75	2.15232	10.985	40.87	1.77815
20.09.2012 01:21:54.160000	1286.79	2.15166	10.98	41.58	1.77275
20.09.2012 01:21:54.170000	1286.71	2.14982	10.98	42.1	1.76563
20.09.2012 01:21:54.180000	1275.03	2.14866	10.9767	42.4867	1.76378
20.09.2012 01:21:54.190000	1267.64	2.14782	10.97	43.26	1.76598
20.09.2012 01:21:54.200000	1293.16	2.14782	10.97	43.48	1.76916
20.09.2012 01:21:54.210000	1235.24	2.14732	10.97	44.12	1.77343
20.09.2012 01:21:54.220000	1245.96	2.14616	10.9767	43.5533	1.77971
20.09.2012 01:21:54.230000	1241.24	2.14582	10.98	43.27	1.7809
20.09.2012 01:21:54.240000	1232.44	2.14566	10.9867	42.73	1.78165
20.09.2012 01:21:54.250000	1237.47	2.14607	10.99	42.46	1.78195
20.09.2012 01:21:54.260000	1241.16	2.14666	10.99	42.0467	1.78425
20.09.2012 01:21:54.270000	1265.19	2.14932	10.99	42.1	1.78561
20.09.2012 01:21:54.280000	1234.57	2.14832	10.99	42.1267	1.78488
20.09.2012 01:21:54.290000	1263.3	2.14957	10.98	42.74	1.78129
20.09.2012 01:21:54.300000	1280.14	2.14916	10.97	43.68	1.77861
20.09.2012 01:21:54.310000	1274.96	2.14807	10.97	44.36	1.77544
20.09.2012 01:21:54.320000	1276.43	2.14599	10.97	44.98	1.77268
20.09.2012 01:21:54.330000	1267.41	2.14532	10.97	44.98	1.76996
20.09.2012 01:21:54.340000	1255.51	2.14282	10.98	44.05	1.76783
20.09.2012 01:21:54.350000	1270.31	2.14282	10.98	44.1	1.76862
20.09.2012 01:21:54.360000	1263.79	2.14182	10.9867	43.8633	1.77401
20.09.2012 01:21:54.370000	1262.53	2.14132	10.99	43.72	1.77855
20.09.2012 01:21:54.380000	1278.87	2.14166	10.99	43.23	1.78424
20.09.2012 01:21:54.390000	1278.96	2.14032	10.99	42.91	1.78974
20.09.2012 01:21:54.400000	1277.18	2.13999	10.99	43.0833	1.79076
20.09.2012 01:21:54.410000	1275.3	2.13982	10.99	42.975	1.7904
20.09.2012 01:21:54.420000	1280.81	2.13999	10.99	42.78	1.7898
20.09.2012 01:21:54.430000	1282.16	2.14032	10.99	42.965	1.7882
20.09.2012 01:21:54.440000	1302.53	2.14049	10.99	43.15	1.78511
20.09.2012 01:21:54.450000	1291.14	2.13982	10.99	43.08	1.78245
20.09.2012 01:21:54.460000	1304.31	2.13799	10.99	43.09	1.77849
20.09.2012 01:21:54.470000	1319.13	2.13832	10.99	42.89	1.77755
20.09.2012 01:21:54.480000	1298.71	2.13682	10.99	42.6167	1.77655
20.09.2012 01:21:54.490000	1291.6	2.13532	10.99	42.47	1.77643
20.09.2012 01:21:54.500000	1278.73	2.13449	10.99	42.36	1.77712
20.09.2012 01:21:54.510000	1253.21	2.13332	10.99	43.06	1.77747
20.09.2012 01:21:54.520000	1263.42	2.13382	10.99	43.06	1.77851
20.09.2012 01:21:54.530000	1269.52	2.13382	10.98	43.73	1.77993
20.09.2012 01:21:54.540000	1278.58	2.13416	10.98	43.9233	1.7808
20.09.2012 01:21:54.550000	1285.17	2.13457	10.98	44.45	1.78275
20.09.2012 01:21:54.560000	1303.13	2.13482	10.98	44.59	1.78304
20.09.2012 01:21:54.570000	1316.67	2.13732	10.98	44.79	1.78156
20.09.2012 01:21:54.580000	1320.95	2.13666	10.98	44.6633	1.78087
20.09.2012 01:21:54.590000	1307	2.13507	10.98	44.6	1.7805
20.09.2012 01:21:54.600000	1279.24	2.13282	10.9867	44.3267	1.78022
20.09.2012 01:21:54.610000	1273.86	2.13232	10.99	43.95	1.77993
20.09.2012 01:21:54.620000	1250.13	2.12916	10.99	43.9333	1.78091
20.09.2012 01:21:54.630000	1268.99	2.12932	10.99	43.9	1.78244
20.09.2012 01:21:54.640000	1242.64	2.12866	10.99	43.6	1.7819
20.09.2012 01:21:54.650000	1254.54	2.12957	10.99	43.38	1.78165
20.09.2012 01:21:54.660000	1271.19	2.13066	10.99	43.4933	1.7811
20.09.2012 01:21:54.670000	1272.64	2.13082	10.99	43.72	1.77907
20.09.2012 01:21:54.680000	1306.11	2.13249	10.99	43.84	1.77575
20.09.2012 01:21:54.690000	1328.44	2.13282	10.99	43.84	1.77275
20.09.2012 01:21:54.700000	1341.51	2.13366	10.99	43.5233	1.77042
20.09.2012 01:21:54.710000	1344.18	2.13382	10.99	43.4	1.77056
20.09.2012 01:21:54.720000	1343.15	2.13249	10.99	43.56	1.77256
20.09.2012 01:21:54.730000	1318.89	2.13082	10.99	43.64	1.77511
20.09.2012 01:21:54.740000	1306.69	2.12982	10.9867	43.94	1.77739
20.09.2012 01:21:54.750000	1285.38	2.12782	10.98	43.7	1.78115
20.09.2012 01:21:54.760000	1266.96	2.12732	10.9867	44.2533	1.78207
20.09.2012 01:21:54.770000	1258.21	2.12632	10.99	44.335	1.78484
20.09.2012 01:21:54.780000	1245.01	2.12566	10.99	44.14	1.78593
20.09.2012 01:21:54.790000	1231.8	2.12582	10.99	44.205	1.78625
20.09.2012 01:21:54.800000	1211.81	2.12866	10.99	44.29	1.7858
20.09.2012 01:21:54.810000	1205.73	2.12932	10.99	44.29	1.78347
20.09.2012 01:21:54.820000	1240.72	2.13249	11	43.42	1.77947
20.09.2012 01:21:54.830000	1253.88	2.13282	11.005	43.18	1.77736
20.09.2012 01:21:54.840000	1268.23	2.13432	11.0033	42.4933	1.77451
20.09.2012 01:21:54.850000	1301.81	2.13632	11	42.27	1.77019
20.09.2012 01:21:54.860000	1306.68	2.13616	10.99	42.82	1.76774
20.09.2012 01:21:54.870000	1306.43	2.13482	10.99	42.9	1.76461
20.09.2012 01:21:54.880000	1307.55	2.13282	10.99	42.9	1.76404
20.09.2012 01:21:54.890000	1253.1	2.12807	10.98	44.775	1.76677
20.09.2012 01:21:54.900000	1263.28	2.12582	10.98	44.94	1.77035
20.09.2012 01:21:54.910000	1264.56	2.12507	10.98	45.43	1.77275
20.09.2012 01:21:54.920000	1228.95	2.12282	10.98	45.92	1.7757
20.09.2012 01:21:54.930000	1220.37	2.12282	10.98	45.81	1.77658
20.09.2012 01:21:54.940000	1231.32	2.12399	10.99	45.21	1.77949
20.09.2012 01:21:54.950000	1233.69	2.12582	10.99	44.835	1.78236
20.09.2012 01:21:54.960000	1256.25	2.12699	10.9933	44.0333	1.78317
20.09.2012 01:21:54.970000	1279.18	2.12832	11	43.18	1.78385
20.09.2012 01:21:54.980000	1303.8	2.12966	11	42.71	1.78354
20.09.2012 01:21:54.990000	1310.01	2.13132	10.99	43.37	1.77943
20.09.2012 01:21:55.000000	1338.19	2.13032	10.99	43.37	1.777
20.09.2012 01:21:55.010000	1321.09	2.12982	10.99	44.14	1.77467
20.09.2012 01:21:55.020000	1317.41	2.12799	10.9867	44.3567	1.77382
20.09.2012 01:21:55.030000	1321.45	2.12757	10.98	45.36	1.77361
20.09.2012 01:21:55.040000	1297.96	2.12532	10.98	45.93	1.77395
20.09.2012 01:21:55.050000	1290.72	2.12432	10.98	46.1	1.77507
20.09.2012 01:21:55.060000	1226.5	2.12199	10.9867	45.68	1.77726
20.09.2012 01:21:55.070000	1223.91	2.11982	10.99	44.955	1.78015
20.09.2012 01:21:55.080000	1216.46	2.12032	10.9933	44.1667	1.78153
20.09.2012 01:21:55.090000	1210.73	2.12157	11	43.62	1.78039
20.09.2012 01:21:55.100000	1203.89	2.12282	11	43.6767	1.77813
20.09.2012 01:21:55.110000	1243.01	2.12632	11	43.79	1.77372
20.09.2012 01:21:55.120000	1248.11	2.12932	10.9933	42.9767	1.7714
20.09.2012 01:21:55.130000	1300.25	2.13282	10.99	43.86	1.76798
20.09.2012 01:21:55.140000	1318.72	2.13249	10.9867	44.2933	1.76545
20.09.2012 01:21:55.150000	1331.4	2.13157	10.98	45.16	1.76455
20.09.2012 01:21:55.160000	1325.47	2.12882	10.98	45.94	1.76327
20.09.2012 01:21:55.170000	1335.1	2.12782	10.98	45.65	1.76358
20.09.2012 01:21:55.180000	1308.47	2.12466	10.9867	45.7833	1.76787
20.09.2012 01:21:55.190000	1280.5	2.12182	10.99	45.85	1.77226
20.09.2012 01:21:55.200000	1260.67	2.12016	10.99	45.55	1.77524
20.09.2012 01:21:55.210000	1233.02	2.11807	10.99	45.4	1.77877
20.09.2012 01:21:55.220000	1226.82	2.11732	10.99	44.9333	1.78109
20.09.2012 01:21:55.230000	1218.39	2.11782	10.99	44.34	1.78494
20.09.2012 01:21:55.240000	1228.4	2.11982	10.9967	44.2933	1.78477
20.09.2012 01:21:55.250000	1202.16	2.12007	11	43.64	1.78211
20.09.2012 01:21:55.260000	1208.89	2.12299	11	43.01	1.77824
20.09.2012 01:21:55.270000	1246.99	2.12557	11	42.89	1.77537
20.09.2012 01:21:55.280000	1296.77	2.12716	11.0067	42.6167	1.76978
20.09.2012 01:21:55.290000	1304.24	2.12732	11.01	42.54	1.76586
20.09.2012 01:21:55.300000	1327.17	2.12716	11	42.4	1.76439
20.09.2012 01:21:55.310000	1341.74	2.12532	11	42.655	1.76369
20.09.2012 01:21:55.320000	1330.2	2.12332	10.9933	43.6767	1.76445
20.09.2012 01:21:55.330000	1298.92	2.12057	10.99	44.06	1.76978
20.09.2012 01:21:55.340000	1284.79	2.11865	10.99	44.4	1.7729
20.09.2012 01:21:55.350000	1272.62	2.11632	10.99	44.94	1.77752
20.09.2012 01:21:55.360000	1247.45	2.11482	10.99	45.48	1.78022
20.09.2012 01:21:55.370000	1220.16	2.11482	10.99	45.585	1.78103
20.09.2012 01:21:55.380000	1228.08	2.11532	10.99	45.83	1.77975
20.09.2012 01:21:55.390000	1213.17	2.11632	10.995	45.26	1.77836
20.09.2012 01:21:55.400000	1229.04	2.12066	11	44.3333	1.77576
20.09.2012 01:21:55.410000	1266.76	2.12332	11	43.62	1.77334
20.09.2012 01:21:55.420000	1272.67	2.12499	11	43.11	1.7666
20.09.2012 01:21:55.430000	1307.77	2.12682	10.99	43.99	1.75874
20.09.2012 01:21:55.440000	1337.73	2.12582	10.99	43.99	1.75654
20.09.2012 01:21:55.450000	1302.89	2.12282	10.99	43.9	1.75572
20.09.2012 01:21:55.460000	1326.44	2.12182	10.99	43.9467	1.75741
20.09.2012 01:21:55.470000	1323.11	2.11982	10.99	44.225	1.76191
20.09.2012 01:21:55.480000	1276.58	2.11566	10.99	44.41	1.76827
20.09.2012 01:21:55.490000	1285.61	2.11432	10.99	44.53	1.77134
20.09.2012 01:21:55.500000	1252.55	2.11199	10.99	44.5767	1.77783
20.09.2012 01:21:55.510000	1238.13	2.11132	10.99	44.83	1.78012
20.09.2012 01:21:55.520000	1236.28	2.11132	10.99	45.0567	1.78058
20.09.2012 01:21:55.530000	1233.91	2.11132	10.99	45.05	1.77954
20.09.2012 01:21:55.540000	1243.39	2.11332	10.99	44.8433	1.77455
20.09.2012 01:21:55.550000	1265.44	2.11632	10.99	44.43	1.76976
20.09.2012 01:21:55.560000	1287.61	2.11832	10.9967	44.23	1.76724
20.09.2012 01:21:55.570000	1313.45	2.12057	11	44.04	1.76012
20.09.2012 01:21:55.580000	1331.67	2.12082	10.9967	43.9767	1.75788
20.09.2012 01:21:55.590000	1334.4	2.12057	10.99	43.85	1.75505
20.09.2012 01:21:55.600000	1348.4	2.11916	10.98	44.78	1.75519
20.09.2012 01:21:55.610000	1338.64	2.11782	10.98	44.78	1.75724
20.09.2012 01:21:55.620000	1329.39	2.11549	10.98	46.3933	1.76376
20.09.2012 01:21:55.630000	1286.71	2.11182	10.98	47.02	1.76823
20.09.2012 01:21:55.640000	1272.88	2.11049	10.9733	47.12	1.77587
20.09.2012 01:21:55.650000	1257.67	2.10907	10.97	47.17	1.78067
20.09.2012 01:21:55.660000	1253.83	2.10866	10.9833	47.42	1.78358
20.09.2012 01:21:55.670000	1216.38	2.10882	10.99	47.16	1.78322
20.09.2012 01:21:55.680000	1237.23	2.10932	10.99	46.68	1.78168
20.09.2012 01:21:55.690000	1252.44	2.11407	11	45.36	1.774
20.09.2012 01:21:55.700000	1281.16	2.11665	11.01	44.28	1.7697
20.09.2012 01:21:55.710000	1311.01	2.11807	11.01	44.105	1.76313
20.09.2012 01:21:55.720000	1318.06	2.11899	11	43.47	1.75607
20.09.2012 01:21:55.730000	1345.73	2.11932	11	43.47	1.75244
20.09.2012 01:21:55.740000	1339.96	2.11749	10.99	43.88	1.75192
20.09.2012 01:21:55.750000	1309.55	2.11532	10.99	44.565	1.75221
20.09.2012 01:21:55.760000	1304.61	2.11416	10.9833	46.0767	1.75538
20.09.2012 01:21:55.770000	1280.72	2.11182	10.98	46.49	1.75905
20.09.2012 01:21:55.780000	1264.75	2.11132	10.98	46.43	1.76528
20.09.2012 01:21:55.790000	1286.28	2.11332	10.98	46.97	1.77462
20.09.2012 01:21:55.800000	1281.39	2.11182	10.98	46.97	1.77639
20.09.2012 01:21:55.810000	1247.54	2.11007	10.99	46.585	1.77768
20.09.2012 01:21:55.820000	1236.94	2.10932	10.99	46.39	1.77729
20.09.2012 01:21:55.830000	1234.81	2.11007	10.995	45.81	1.77671
20.09.2012 01:21:55.840000	1273.64	2.11282	11	45.23	1.77411
20.09.2012 01:21:55.850000	1276.73	2.11432	11	44.41	1.77067
20.09.2012 01:21:55.860000	1277.81	2.11499	10.99	44.06	1.7626
20.09.2012 01:21:55.870000	1303.01	2.11582	10.985	45.095	1.75892
20.09.2012 01:21:55.880000	1337.45	2.11649	10.9767	46.4167	1.75434
20.09.2012 01:21:55.890000	1336.64	2.11557	10.97	46.99	1.75291
20.09.2012 01:21:55.900000	1333.39	2.11449	10.97	47.1067	1.75492
20.09.2012 01:21:55.910000	1298.01	2.10882	10.98	48.34	1.75875
20.09.2012 01:21:55.920000	1302.7	2.10932	10.98	48.34	1.76124
20.09.2012 01:21:55.930000	1284.29	2.10732	10.98	48.33	1.76875
20.09.2012 01:21:55.940000	1294.2	2.10682	10.98	48.2667	1.77243
20.09.2012 01:21:55.950000	1300.25	2.10657	10.985	47.145	1.77659
20.09.2012 01:21:55.960000	1284.94	2.10616	10.99	46.15	1.77884
20.09.2012 01:21:55.970000	1309.34	2.10682	11	45.99	1.77886
20.09.2012 01:21:55.980000	1319.26	2.10882	11	45.2233	1.77395
20.09.2012 01:21:55.990000	1324	2.10932	11	44.84	1.7709
20.09.2012 01:21:56.000000	1340.48	2.10999	11.0033	44.5367	1.76511
20.09.2012 01:21:56.010000	1372.58	2.11107	11	44.17	1.76074
20.09.2012 01:21:56.020000	1376.2	2.11099	10.9967	44.55	1.75483
20.09.2012 01:21:56.030000	1366.36	2.11032	10.99	45.31	1.74914
20.09.2012 01:21:56.040000	1379.46	2.10982	10.99	45.8367	1.74981
20.09.2012 01:21:56.050000	1335.09	2.10782	10.99	46.305	1.75672
20.09.2012 01:21:56.060000	1334.43	2.10766	10.99	46.54	1.76564
20.09.2012 01:21:56.070000	1334.98	2.10732	10.99	46.6	1.77084
20.09.2012 01:21:56.080000	1277.45	2.10499	10.99	46.63	1.77945
20.09.2012 01:21:56.090000	1249.2	2.10432	10.99	46.63	1.78189
20.09.2012 01:21:56.100000	1293.61	2.10432	10.99	46.2067	1.78364
20.09.2012 01:21:56.110000	1264.99	2.10282	10.99	46.04	1.78343
20.09.2012 01:21:56.120000	1270.61	2.10382	10.99	45.7	1.7815
20.09.2012 01:21:56.130000	1306.24	2.10532	10.99	45.53	1.77291
20.09.2012 01:21:56.140000	1307.05	2.10566	11	45.39	1.76823
20.09.2012 01:21:56.150000	1342.29	2.10682	11	45.23	1.76124
20.09.2012 01:21:56.160000	1364.16	2.10732	10.99	45.67	1.75399
20.09.2012 01:21:56.170000	1373.9	2.10607	10.99	45.855	1.75111
20.09.2012 01:21:56.180000	1387.96	2.10399	10.99	46.04	1.74944
20.09.2012 01:21:56.190000	1374.46	2.10232	10.99	46.04	1.74848
20.09.2012 01:21:56.200000	1370.88	2.09932	10.99	45.76	1.75207
20.09.2012 01:21:56.210000	1379.92	2.09932	10.99	45.76	1.7551
20.09.2012 01:21:56.220000	1360.6	2.09749	10.99	46.51	1.76686
20.09.2012 01:21:56.230000	1315.56	2.09482	10.99	46.695	1.77614
20.09.2012 01:21:56.240000	1313.27	2.09399	10.9867	47.0667	1.78027
20.09.2012 01:21:56.250000	1322.89	2.09407	10.98	47.44	1.78457
20.09.2012 01:21:56.260000	1339.91	2.09516	10.98	47.37	1.78558
20.09.2012 01:21:56.270000	1356.83	2.09632	10.99	47.37	1.78534
20.09.2012 01:21:56.280000	1335.52	2.09682	10.99	47.37	1.78331
20.09.2012 01:21:56.290000	1385.56	2.09832	11	46.04	1.77685
20.09.2012 01:21:56.300000	1377.9	2.09832	11	45.9	1.77134
20.09.2012 01:21:56.310000	1388.22	2.09782	11	45.52	1.76785
20.09.2012 01:21:56.320000	1395.96	2.09666	11	45.14	1.76376
20.09.2012 01:21:56.330000	1397.66	2.09532	11	45.29	1.76188
20.09.2012 01:21:56.340000	1370.8	2.09432	10.9967	45.3267	1.76403
20.09.2012 01:21:56.350000	1400.76	2.09332	10.985	46.38	1.76596
20.09.2012 01:21:56.360000	1385.38	2.09266	10.98	47.36	1.76685
20.09.2012 01:21:56.370000	1360.49	2.09032	10.98	47.67	1.77066
20.09.2012 01:21:56.380000	1348.25	2.08932	10.98	47.7967	1.7718
20.09.2012 01:21:56.390000	1354.95	2.09007	10.98	48.05	1.77348
20.09.2012 01:21:56.400000	1368.82	2.09082	10.98	47.83	1.7744
20.09.2012 01:21:56.410000	1346.41	2.09082	10.99	47.58	1.77333
20.09.2012 01:21:56.420000	1340.1	2.09149	10.99	47.2767	1.77125
20.09.2012 01:21:56.430000	1345.62	2.09207	10.99	46.67	1.77
20.09.2012 01:21:56.440000	1386.12	2.09382	10.99	47.14	1.76689
20.09.2012 01:21:56.450000	1359.04	2.09382	10.98	47.52	1.76521
20.09.2012 01:21:56.460000	1384.27	2.09249	10.98	47.9333	1.76026
20.09.2012 01:21:56.470000	1369.02	2.08982	10.98	48.14	1.75932
20.09.2012 01:21:56.480000	1374.58	2.08899	10.98	48.4867	1.76068
20.09.2012 01:21:56.490000	1377.47	2.08832	10.98	48.55	1.76436
20.09.2012 01:21:56.500000	1383.54	2.08832	10.9833	48.37	1.76702
20.09.2012 01:21:56.510000	1393.23	2.08807	10.99	48.23	1.76935
20.09.2012 01:21:56.520000	1357.93	2.08632	10.99	47.98	1.77155
20.09.2012 01:21:56.530000	1399.2	2.08732	10.99	47.98	1.77228
20.09.2012 01:21:56.540000	1421.27	2.08732	10.99	47.39	1.773
20.09.2012 01:21:56.550000	1418.53	2.08732	10.995	47.39	1.77388
20.09.2012 01:21:56.560000	1416.15	2.08699	11	46.8033	1.77459
20.09.2012 01:21:56.570000	1426.06	2.08632	11	46.51	1.77488
20.09.2012 01:21:56.580000	1412	2.08699	10.99	46.7	1.77293
20.09.2012 01:21:56.590000	1383.45	2.08532	10.98	48	1.77211
20.09.2012 01:21:56.600000	1397.51	2.08466	10.98	48.0467	1.77231
20.09.2012 01:21:56.610000	1407.2	2.08332	10.98	48.235	1.77138
20.09.2012 01:21:56.620000	1405.65	2.08332	10.98	48.4	1.77019
20.09.2012 01:21:56.630000	1391.34	2.08307	10.98	48.785	1.76854
20.09.2012 01:21:56.640000	1392.55	2.08315	10.98	49.1	1.76816
20.09.2012 01:21:56.650000	1408.97	2.08282	10.98	49.1	1.76917
20.09.2012 01:21:56.660000	1406.08	2.08149	10.99	49.41	1.77122
20.09.2012 01:21:56.670000	1422.73	2.08232	10.99	49.405	1.77347
20.09.2012 01:21:56.680000	1425.91	2.08149	10.9933	49.1733	1.7736
20.09.2012 01:21:56.690000	1434.38	2.08132	11	48.72	1.77239
20.09.2012 01:21:56.700000	1444.4	2.08182	11	47.64	1.77103
20.09.2012 01:21:56.710000	1432.93	2.08182	11	47.54	1.76915
20.09.2012 01:21:56.720000	1487.53	2.08282	11	47.54	1.76864
20.09.2012 01:21:56.730000	1464.32	2.08007	10.985	48.355	1.76761
20.09.2012 01:21:56.740000	1434.4	2.07716	10.98	48.71	1.76702
20.09.2012 01:21:56.750000	1421.94	2.07532	10.98	49.855	1.7658
20.09.2012 01:21:56.760000	1378.36	2.07232	10.98	51	1.76439
20.09.2012 01:21:56.770000	1355.74	2.07232	10.98	50.85	1.76559
20.09.2012 01:21:56.780000	1364.68	2.07282	10.99	50.61	1.76994
20.09.2012 01:21:56.790000	1375.47	2.07332	10.995	50.555	1.77213
20.09.2012 01:21:56.800000	1373.39	2.07399	11.0033	50.0433	1.77645
20.09.2012 01:21:56.810000	1400.76	2.07557	11.01	49.13	1.77944
20.09.2012 01:21:56.820000	1408.31	2.07616	11.01	49.0067	1.78089
20.09.2012 01:21:56.830000	1424.28	2.07632	11.01	47.66	1.7799
20.09.2012 01:21:56.840000	1434.04	2.07632	11.01	47.66	1.77829
20.09.2012 01:21:56.850000	1447.25	2.07557	11.01	48.21	1.77281
20.09.2012 01:21:56.860000	1451.34	2.07515	11.0067	48.56	1.77066
20.09.2012 01:21:56.870000	1459.89	2.07507	11	49.855	1.76889
20.09.2012 01:21:56.880000	1450.46	2.07232	11	50.45	1.76838
20.09.2012 01:21:56.890000	1430.04	2.07132	11	50.57	1.76711
20.09.2012 01:21:56.900000	1422.3	2.06982	10.9933	51.4433	1.76743
20.09.2012 01:21:56.910000	1404.98	2.06732	10.99	51.88	1.76906
20.09.2012 01:21:56.920000	1406.32	2.06749	10.9933	51.71	1.77169
20.09.2012 01:21:56.930000	1395.55	2.06682	11	51.43	1.77665
20.09.2012 01:21:56.940000	1375.61	2.06649	11.0033	51.4	1.77924
20.09.2012 01:21:56.950000	1415.64	2.06882	11.01	51.34	1.78183
20.09.2012 01:21:56.960000	1387.68	2.06932	11.01	50.7933	1.78246
20.09.2012 01:21:56.970000	1418.52	2.07082	11.01	50.705	1.78188
20.09.2012 01:21:56.980000	1441.74	2.07216	11.01	50.9433	1.78171
20.09.2012 01:21:56.990000	1444.91	2.07232	11.01	51.05	1.78011
20.09.2012 01:21:57.000000	1448.16	2.07249	11.01	51.35	1.77724
20.09.2012 01:21:57.010000	1435.59	2.07282	11.01	51.35	1.77502
20.09.2012 01:21:57.020000	1458.75	2.07149	11.0067	52.0933	1.76939
20.09.2012 01:21:57.030000	1402.3	2.06932	11.01	52.31	1.76746
20.09.2012 01:21:57.040000	1421.25	2.06849	11.01	52.1367	1.7659
20.09.2012 01:21:57.050000	1413.54	2.06657	11.01	52.05	1.76584
20.09.2012 01:21:57.060000	1403.29	2.06599	11.01	51.25	1.76788
20.09.2012 01:21:57.070000	1404.55	2.06582	11.03	50.73	1.77128
20.09.2012 01:21:57.080000	1366.37	2.06582	11.03	50.0633	1.77344
20.09.2012 01:21:57.090000	1373.91	2.06782	11.025	49.645	1.77692
20.09.2012 01:21:57.100000	1388.05	2.07015	11.02	49.56	1.7779
20.09.2012 01:21:57.110000	1392.45	2.07107	11.02	50.085	1.77873
20.09.2012 01:21:57.120000	1395.35	2.07249	11.01	51.57	1.77749
20.09.2012 01:21:57.130000	1422.28	2.07282	11.01	51.57	1.77638
20.09.2012 01:21:57.140000	1415.19	2.07432	11.01	52.36	1.77669
20.09.2012 01:21:57.150000	1438.26	2.07432	11.01	52.44	1.77643
20.09.2012 01:21:57.160000	1437.15	2.07332	11.0167	52.5533	1.7765
20.09.2012 01:21:57.170000	1417.72	2.07057	11.03	52.62	1.77639
20.09.2012 01:21:57.180000	1412.43	2.06932	11.03	51.39	1.77474
20.09.2012 01:21:57.190000	1390.58	2.06732	11.03	51.43	1.77657
20.09.2012 01:21:57.200000	1394.56	2.06582	11.03	51.43	1.77704
20.09.2012 01:21:57.210000	1378.02	2.06507	11.03	51.475	1.77785
20.09.2012 01:21:57.220000	1368.14	2.06366	11.03	51.76	1.7769
20.09.2012 01:21:57.230000	1357.6	2.06357	11.03	51.46	1.77496
20.09.2012 01:21:57.240000	1383.63	2.06499	11.03	51.16	1.77359
20.09.2012 01:21:57.250000	1395.91	2.06632	11.04	51.41	1.77393
20.09.2012 01:21:57.260000	1410.75	2.06716	11.04	50.9967	1.77344
20.09.2012 01:21:57.270000	1457.99	2.07032	11.03	51.25	1.77151
20.09.2012 01:21:57.280000	1463.02	2.07032	11.03	51.25	1.77064
20.09.2012 01:21:57.290000	1469.31	2.07057	11.04	51.83	1.76932
20.09.2012 01:21:57.300000	1475.24	2.07016	11.04	51.61	1.76946
20.09.2012 01:21:57.310000	1478.87	2.06907	11.04	50.965	1.77177
20.09.2012 01:21:57.320000	1426.49	2.06532	11.04	50.76	1.77705
20.09.2012 01:21:57.330000	1440.92	2.06482	11.03	51.1	1.77927
20.09.2012 01:21:57.340000	1404.76	2.06199	11.03	51.8867	1.78372
20.09.2012 01:21:57.350000	1381.57	2.06107	11.03	52.28	1.78453
20.09.2012 01:21:57.360000	1368.82	2.06082	11.03	52.3967	1.78504
20.09.2012 01:21:57.370000	1379.7	2.06132	11.03	52.31	1.78566
20.09.2012 01:21:57.380000	1375.55	2.06349	11.0367	52.22	1.7823
20.09.2012 01:21:57.390000	1416.96	2.06682	11.05	52.04	1.77463
20.09.2012 01:21:57.400000	1415.03	2.06749	11.0433	51.58	1.77087
20.09.2012 01:21:57.410000	1424.61	2.06907	11.05	50.99	1.76485
20.09.2012 01:21:57.420000	1448.4	2.07015	11.0533	50.0167	1.7633
20.09.2012 01:21:57.430000	1464.34	2.07132	11.04	48.79	1.76132
20.09.2012 01:21:57.440000	1444.02	2.06982	11.04	50.89	1.76161
20.09.2012 01:21:57.450000	1406.73	2.06732	11.04	50.89	1.7612
20.09.2012 01:21:57.460000	1414.45	2.06649	11.0233	52.7033	1.76436
20.09.2012 01:21:57.470000	1409.87	2.06557	11.02	53.19	1.76767
20.09.2012 01:21:57.480000	1402.54	2.06432	11.02	54.23	1.77451
20.09.2012 01:21:57.490000	1400.54	2.06382	11.02	54.75	1.77869
20.09.2012 01:21:57.500000	1366.59	2.06249	11.03	54.55	1.77997
20.09.2012 01:21:57.510000	1346.19	2.06282	11.04	53.78	1.78022
20.09.2012 01:21:57.520000	1357.58	2.06349	11.0467	53.7733	1.7798
20.09.2012 01:21:57.530000	1379.04	2.06632	11.055	52.53	1.77875
20.09.2012 01:21:57.540000	1379.98	2.06765	11.06	51.29	1.77735
20.09.2012 01:21:57.550000	1408.74	2.07007	11.065	50.665	1.77416
20.09.2012 01:21:57.560000	1470.87	2.07432	11.04	51	1.76749
20.09.2012 01:21:57.570000	1466.22	2.07532	11.04	51	1.76425
20.09.2012 01:21:57.580000	1494.45	2.07382	11.03	51.92	1.76356
20.09.2012 01:21:57.590000	1482.51	2.07207	11.03	53.36	1.76501
20.09.2012 01:21:57.600000	1456.82	2.06916	11.0333	54.6033	1.7685
20.09.2012 01:21:57.610000	1449.59	2.06782	11.04	54.21	1.77092
20.09.2012 01:21:57.620000	1419.79	2.06516	11.04	54.35	1.77627
20.09.2012 01:21:57.630000	1386.11	2.06232	11.05	53.87	1.78279
20.09.2012 01:21:57.640000	1364.52	2.06232	11.05	53.87	1.78589
20.09.2012 01:21:57.650000	1371.26	2.06257	11.05	53.48	1.79127
20.09.2012 01:21:57.660000	1361.94	2.06266	11.0533	53.2167	1.79203
20.09.2012 01:21:57.670000	1372.15	2.06432	11.065	52.215	1.79064
20.09.2012 01:21:57.680000	1393.9	2.06682	11.07	51.74	1.78568
20.09.2012 01:21:57.690000	1366.37	2.06732	11.08	50.67	1.78218
20.09.2012 01:21:57.700000	1447.44	2.07216	11.0667	49.9433	1.77396
20.09.2012 01:21:57.710000	1457.13	2.07307	11.055	51.165	1.7699
20.09.2012 01:21:57.720000	1455.26	2.07266	11.05	52.9333	1.76254
20.09.2012 01:21:57.730000	1458.11	2.07182	11.05	53.3	1.75796
20.09.2012 01:21:57.740000	1475.1	2.07182	11.05	53.5767	1.75654
20.09.2012 01:21:57.750000	1458.68	2.06982	11.05	54.13	1.76028
20.09.2012 01:21:57.760000	1459.11	2.06832	11.05	54.49	1.76429
20.09.2012 01:21:57.770000	1421.83	2.06582	11.06	54.2	1.77483
20.09.2012 01:21:57.780000	1406.45	2.06449	11.0633	53.72	1.77862
20.09.2012 01:21:57.790000	1386.78	2.06307	11.07	52.76	1.78492
20.09.2012 01:21:57.800000	1356.19	2.06182	11.07	52.4	1.79188
20.09.2012 01:21:57.810000	1365.51	2.06182	11.07	52.4	1.79479
20.09.2012 01:21:57.820000	1340.04	2.06382	11.0767	51.7267	1.79695
20.09.2012 01:21:57.830000	1363.26	2.06607	11.08	51.39	1.79604
20.09.2012 01:21:57.840000	1416	2.06999	11.08	51.33	1.79001
20.09.2012 01:21:57.850000	1449.67	2.07232	11.08	51.3	1.78474
20.09.2012 01:21:57.860000	1469.01	2.07299	11.08	50.3567	1.77671
20.09.2012 01:21:57.870000	1462.65	2.07282	11.08	50.61	1.7683
20.09.2012 01:21:57.880000	1456.2	2.07032	11.08	50.49	1.76684
20.09.2012 01:21:57.890000	1453.24	2.06957	11.07	52.045	1.76692
20.09.2012 01:21:57.900000	1465.05	2.06866	11.06	53.66	1.76868
20.09.2012 01:21:57.910000	1444.05	2.06732	11.065	53.68	1.77111
20.09.2012 01:21:57.920000	1401.34	2.06466	11.06	52.86	1.78067
20.09.2012 01:21:57.930000	1397.2	2.06432	11.06	52.86	1.7844
20.09.2012 01:21:57.940000	1380.28	2.06349	11.06	54.29	1.79078
20.09.2012 01:21:57.950000	1376.8	2.06282	11.065	54.055	1.79252
20.09.2012 01:21:57.960000	1376.52	2.06332	11.0767	52.7333	1.79094
20.09.2012 01:21:57.970000	1402.79	2.06632	11.08	52.19	1.78755
20.09.2012 01:21:57.980000	1419.27	2.06849	11.08	51.59	1.78538
20.09.2012 01:21:57.990000	1432.91	2.07032	11.08	52.04	1.77972
20.09.2012 01:21:58.000000	1451.12	2.07132	11.08	52.04	1.7754
20.09.2012 01:21:58.010000	1453.33	2.07107	11.07	52.21	1.77143
20.09.2012 01:21:58.020000	1451.27	2.07116	11.07	52.17	1.77126
20.09.2012 01:21:58.030000	1469.1	2.07107	11.07	52.765	1.77268
20.09.2012 01:21:58.040000	1448.76	2.06949	11.07	53.36	1.77863
20.09.2012 01:21:58.050000	1438.24	2.06782	11.08	53.56	1.78183
20.09.2012 01:21:58.060000	1422.42	2.06549	11.09	52.37	1.78898
20.09.2012 01:21:58.070000	1407.66	2.06432	11.085	52.065	1.7919
20.09.2012 01:21:58.080000	1402.93	2.06415	11.0833	51.9967	1.7936
20.09.2012 01:21:58.090000	1382.01	2.06407	11.09	52.47	1.79386
20.09.2012 01:21:58.100000	1379.46	2.06449	11.0933	52.14	1.7926
20.09.2012 01:21:58.110000	1357.48	2.06482	11.1	50.48	1.78946
20.09.2012 01:21:58.120000	1402.53	2.06732	11.1	50.48	1.78586
20.09.2012 01:21:58.130000	1440.71	2.07007	11.09	50.45	1.78093
20.09.2012 01:21:58.140000	1450.98	2.07099	11.0867	50.5367	1.77738
20.09.2012 01:21:58.150000	1460.1	2.07107	11.08	52.17	1.77501
20.09.2012 01:21:58.160000	1481.9	2.07199	11.08	53.63	1.77333
20.09.2012 01:21:58.170000	1462.22	2.07032	11.08	53.58	1.77382
20.09.2012 01:21:58.180000	1465.7	2.06949	11.08	53.42	1.78044
20.09.2012 01:21:58.190000	1444.03	2.06732	11.08	53.34	1.7847
20.09.2012 01:21:58.200000	1438.04	2.06616	11.0833	53.3533	1.79163
20.09.2012 01:21:58.210000	1419.07	2.06482	11.08	53.47	1.79603
20.09.2012 01:21:58.220000	1401.65	2.06449	11.0833	53.3267	1.79892
20.09.2012 01:21:58.230000	1389.22	2.06432	11.09	53.04	1.79818
20.09.2012 01:21:58.240000	1406.53	2.06382	11.09	53.2267	1.79785
20.09.2012 01:21:58.250000	1374.8	2.06457	11.1	52.47	1.79358
20.09.2012 01:21:58.260000	1403.37	2.06699	11.1033	51.93	1.79072
20.09.2012 01:21:58.270000	1423.41	2.06832	11.11	50.85	1.78569
20.09.2012 01:21:58.280000	1429	2.06966	11.11	50.69	1.77886
20.09.2012 01:21:58.290000	1432.69	2.07032	11.11	50.69	1.77424
20.09.2012 01:21:58.300000	1474.56	2.07132	11.0933	51.1633	1.7679
20.09.2012 01:21:58.310000	1471.54	2.07032	11.09	51.41	1.76777
20.09.2012 01:21:58.320000	1461.56	2.06932	11.09	52.3833	1.77103
20.09.2012 01:21:58.330000	1459.9	2.06757	11.09	52.87	1.77515
20.09.2012 01:21:58.340000	1438.85	2.06632	11.09	53.7567	1.77861
20.09.2012 01:21:58.350000	1412.73	2.06482	11.09	54.27	1.7863
20.09.2012 01:21:58.360000	1427.4	2.06532	11.09	54.27	1.79173
20.09.2012 01:21:58.370000	1413.97	2.06557	11.095	53.825	1.79879
20.09.2012 01:21:58.380000	1403.87	2.06499	11.1	53.38	1.80137
20.09.2012 01:21:58.390000	1403.2	2.06582	11.105	52.885	1.80163
20.09.2012 01:21:58.400000	1443.44	2.06832	11.11	52.36	1.79638
20.09.2012 01:21:58.410000	1428.05	2.06832	11.11	52.36	1.7937
20.09.2012 01:21:58.420000	1439.87	2.06832	11.12	50.17	1.78752
20.09.2012 01:21:58.430000	1441.58	2.06932	11.12	50.315	1.78197
20.09.2012 01:21:58.440000	1454.97	2.06916	11.1067	51.6933	1.77995
20.09.2012 01:21:58.450000	1443.46	2.06832	11.1	52.31	1.77761
20.09.2012 01:21:58.460000	1436.7	2.06765	11.1	53.69	1.77709
20.09.2012 01:21:58.470000	1443.37	2.06707	11.095	53.87	1.77852
20.09.2012 01:21:58.480000	1426.06	2.06682	11.09	54.05	1.78261
20.09.2012 01:21:58.490000	1452.69	2.06682	11.1	54.44	1.78678
20.09.2012 01:21:58.500000	1434.04	2.06632	11.1	54.02	1.79462
20.09.2012 01:21:58.510000	1418.61	2.06557	11.105	53.85	1.79747
20.09.2012 01:21:58.520000	1407.19	2.06516	11.1133	52.8733	1.7989
20.09.2012 01:21:58.530000	1417.41	2.06582	11.12	51.26	1.79887
20.09.2012 01:21:58.540000	1430.28	2.06682	11.12	51.25	1.79788
20.09.2012 01:21:58.550000	1411.41	2.06782	11.12	51.36	1.79582
20.09.2012 01:21:58.560000	1429.6	2.06782	11.12	51.36	1.79416
20.09.2012 01:21:58.570000	1439.03	2.06957	11.105	52.495	1.78784
20.09.2012 01:21:58.580000	1466.89	2.07016	11.1	53.16	1.78449
20.09.2012 01:21:58.590000	1479.31	2.07032	11.095	54.28	1.77879
20.09.2012 01:21:58.600000	1451.56	2.06982	11.09	55.4	1.77524
20.09.2012 01:21:58.610000	1476.19	2.06932	11.09	55.54	1.77581
20.09.2012 01:21:58.620000	1431.54	2.06716	11.1033	55.12	1.77937
20.09.2012 01:21:58.630000	1425.95	2.06632	11.115	53.825	1.78273
20.09.2012 01:21:58.640000	1423.25	2.06566	11.12	52.5767	1.79025
20.09.2012 01:21:58.650000	1431.17	2.06582	11.12	52.25	1.79539
20.09.2012 01:21:58.660000	1410.6	2.06482	11.12	52.2533	1.80094
20.09.2012 01:21:58.670000	1424.29	2.06632	11.12	53.34	1.80491
20.09.2012 01:21:58.680000	1427.24	2.06632	11.12	53.34	1.80526
20.09.2012 01:21:58.690000	1422.95	2.06732	11.12	53.57	1.80153
20.09.2012 01:21:58.700000	1428.41	2.06732	11.12	53.33	1.798
20.09.2012 01:21:58.710000	1426.28	2.06757	11.12	52.85	1.79336
20.09.2012 01:21:58.720000	1465.58	2.06932	11.12	53.53	1.78621
20.09.2012 01:21:58.730000	1450.25	2.06882	11.12	52.94	1.78076
20.09.2012 01:21:58.740000	1418.8	2.06732	11.1333	52.8	1.77686
20.09.2012 01:21:58.750000	1413.39	2.06657	11.14	52.73	1.77579
20.09.2012 01:21:58.760000	1433.75	2.06699	11.1333	52.19	1.77689
20.09.2012 01:21:58.770000	1452.04	2.06832	11.13	51.92	1.77887
20.09.2012 01:21:58.780000	1429.9	2.06782	11.12	52.32	1.78316
20.09.2012 01:21:58.790000	1441.35	2.06732	11.12	52.4	1.78876
20.09.2012 01:21:58.800000	1417.98	2.06632	11.12	52.9467	1.79013
20.09.2012 01:21:58.810000	1409.76	2.06657	11.125	52.95	1.79348
20.09.2012 01:21:58.820000	1423.04	2.06699	11.13	52.47	1.79547
20.09.2012 01:21:58.830000	1455.04	2.06782	11.13	52.05	1.79716
20.09.2012 01:21:58.840000	1438.92	2.06832	11.13	52.25	1.7975
20.09.2012 01:21:58.850000	1428.25	2.06832	11.13	52.25	1.79607
20.09.2012 01:21:58.860000	1457.55	2.06882	11.13	52.88	1.79152
20.09.2012 01:21:58.870000	1453.79	2.06807	11.13	52.8	1.79011
20.09.2012 01:21:58.880000	1430.43	2.06666	11.13	53.0867	1.78734
20.09.2012 01:21:58.890000	1406.31	2.06582	11.13	53.27	1.78555
20.09.2012 01:21:58.900000	1418.52	2.06582	11.13	52.22	1.78611
20.09.2012 01:21:58.910000	1423.84	2.06582	11.13	52.23	1.78674
20.09.2012 01:21:58.920000	1424.72	2.06582	11.13	52.23	1.78804
20.09.2012 01:21:58.930000	1399.31	2.06607	11.14	52.56	1.79138
20.09.2012 01:21:58.940000	1427.17	2.06682	11.14	52.1	1.79168
20.09.2012 01:21:58.950000	1432.84	2.06707	11.135	52.34	1.79128
20.09.2012 01:21:58.960000	1425.39	2.06865	11.13	52.58	1.78878
20.09.2012 01:21:58.970000	1446.69	2.06932	11.12	54.25	1.78664
20.09.2012 01:21:58.980000	1452.23	2.06949	11.13	54.63	1.78255
20.09.2012 01:21:58.990000	1421.38	2.06882	11.135	53.74	1.78112
20.09.2012 01:21:59.000000	1434.85	2.06815	11.14	52.8367	1.78032
20.09.2012 01:21:59.010000	1448.92	2.06757	11.14	52.81	1.7807
20.09.2012 01:21:59.020000	1442.26	2.06682	11.14	52.9167	1.78149
20.09.2012 01:21:59.030000	1410.96	2.06432	11.14	52.78	1.78332
20.09.2012 01:21:59.040000	1398.53	2.06432	11.14	52.78	1.78374
20.09.2012 01:21:59.050000	1404.88	2.06532	11.14	52.39	1.78689
20.09.2012 01:21:59.060000	1399.22	2.06549	11.14	52.5	1.78968
20.09.2012 01:21:59.070000	1405.87	2.06607	11.145	52.425	1.79033
20.09.2012 01:21:59.080000	1388.92	2.06666	11.15	52.13	1.79159
20.09.2012 01:21:59.090000	1413.19	2.06732	11.15	52.12	1.7918
20.09.2012 01:21:59.100000	1433.61	2.06782	11.1533	52.0067	1.79003
20.09.2012 01:21:59.110000	1441.15	2.06882	11.16	51.78	1.78836
20.09.2012 01:21:59.120000	1442.39	2.06915	11.16	51.3	1.78786
20.09.2012 01:21:59.130000	1452.34	2.06982	11.16	50.96	1.78687
20.09.2012 01:21:59.140000	1455.13	2.06982	11.1533	51.3367	1.78579
20.09.2012 01:21:59.150000	1445.14	2.06807	11.14	52.09	1.78366
20.09.2012 01:21:59.160000	1430.93	2.06632	11.14	52.57	1.78108
20.09.2012 01:21:59.170000	1401.86	2.06432	11.14	54.32	1.77967
20.09.2012 01:21:59.180000	1397.08	2.06382	11.14	53.7533	1.78054
20.09.2012 01:21:59.190000	1374.92	2.06407	11.14	52.62	1.78221
20.09.2012 01:21:59.200000	1375.84	2.06516	11.14	52.8	1.7841
20.09.2012 01:21:59.210000	1376.14	2.06532	11.14	52.89	1.78482
20.09.2012 01:21:59.220000	1399.65	2.06666	11.16	52.8267	1.78685
20.09.2012 01:21:59.230000	1426.28	2.06832	11.16	52.86	1.78758
20.09.2012 01:21:59.240000	1417.55	2.06932	11.16	51.9267	1.78838
20.09.2012 01:21:59.250000	1448.36	2.07057	11.16	51.46	1.78792
20.09.2012 01:21:59.260000	1443.95	2.06999	11.1567	51.1667	1.78673
20.09.2012 01:21:59.270000	1438.69	2.06907	11.15	50.82	1.78615
20.09.2012 01:21:59.280000	1413.19	2.06882	11.15	51.3533	1.78504
20.09.2012 01:21:59.290000	1436.49	2.06782	11.15	51.62	1.78394
20.09.2012 01:21:59.300000	1413.63	2.06516	11.15	53.82	1.78424
20.09.2012 01:21:59.310000	1393.1	2.06432	11.15	53.34	1.78492
20.09.2012 01:21:59.320000	1385.01	2.06449	11.1567	52.46	1.78539
20.09.2012 01:21:59.330000	1388.8	2.06582	11.16	52.26	1.78533
20.09.2012 01:21:59.340000	1375.4	2.06566	11.17	51.7	1.7852
20.09.2012 01:21:59.350000	1355.26	2.06532	11.17	51.75	1.78638
20.09.2012 01:21:59.360000	1373.9	2.06566	11.17	51.75	1.78637
20.09.2012 01:21:59.370000	1398.12	2.06782	11.18	49.845	1.78475
20.09.2012 01:21:59.380000	1422.6	2.06916	11.18	49.95	1.78417
20.09.2012 01:21:59.390000	1439.38	2.07032	11.18	49.62	1.78209
20.09.2012 01:21:59.400000	1427.8	2.07032	11.18	49.29	1.77912
20.09.2012 01:21:59.410000	1460.56	2.07082	11.155	51.825	1.77706
20.09.2012 01:21:59.420000	1437.6	2.07016	11.15	52.24	1.77626
20.09.2012 01:21:59.430000	1435.71	2.06957	11.15	52.515	1.77693
20.09.2012 01:21:59.440000	1403.2	2.06632	11.15	52.79	1.7798
20.09.2012 01:21:59.450000	1405.42	2.06532	11.16	53.89	1.78092
20.09.2012 01:21:59.460000	1381.76	2.06349	11.16	53.8833	1.78413
20.09.2012 01:21:59.470000	1359.28	2.06232	11.165	53.62	1.78689
20.09.2012 01:21:59.480000	1360.61	2.06299	11.17	52.7633	1.78833
20.09.2012 01:21:59.490000	1354.51	2.06382	11.17	51.57	1.78957
20.09.2012 01:21:59.500000	1362.09	2.06499	11.1733	51.1733	1.78913
20.09.2012 01:21:59.510000	1382.13	2.06782	11.18	51.17	1.78618
20.09.2012 01:21:59.520000	1403.21	2.06932	11.18	51.17	1.78263
20.09.2012 01:21:59.530000	1428.17	2.07107	11.18	50.23	1.77827
20.09.2012 01:21:59.540000	1436.49	2.07166	11.1767	50.5567	1.77484
20.09.2012 01:21:59.550000	1423.95	2.07207	11.17	51.21	1.77163
20.09.2012 01:21:59.560000	1426.94	2.07116	11.17	51.3433	1.76742
20.09.2012 01:21:59.570000	1422.51	2.07032	11.17	52.08	1.7657
20.09.2012 01:21:59.580000	1418.59	2.06832	11.17	51.8633	1.76593
20.09.2012 01:21:59.590000	1405.42	2.06632	11.17	51.43	1.77161
20.09.2012 01:21:59.600000	1394.62	2.06532	11.17	51.5833	1.77486
20.09.2012 01:21:59.610000	1381.36	2.06407	11.18	51.88	1.782
20.09.2012 01:21:59.620000	1374.22	2.06349	11.18	51.68	1.78482
20.09.2012 01:21:59.630000	1363.49	2.06232	11.18	51.28	1.78709
20.09.2012 01:21:59.640000	1319.11	2.06282	11.1867	50.9733	1.78637
20.09.2012 01:21:59.650000	1366.16	2.06482	11.19	50.82	1.78483
20.09.2012 01:21:59.660000	1393.67	2.06866	11.19	50.62	1.78228
20.09.2012 01:21:59.670000	1405.09	2.07007	11.19	50.18	1.77955
20.09.2012 01:21:59.680000	1425.83	2.07182	11.19	49.9933	1.77243
20.09.2012 01:21:59.690000	1446.9	2.07307	11.19	49.9	1.76736
20.09.2012 01:21:59.700000	1466.43	2.07316	11.19	50.5167	1.76492
20.09.2012 01:21:59.710000	1463.99	2.07082	11.19	50.51	1.76349
20.09.2012 01:21:59.720000	1440.03	2.06882	11.19	50.3967	1.76484
20.09.2012 01:21:59.730000	1402.31	2.06682	11.185	50.455	1.76941
20.09.2012 01:21:59.740000	1387.83	2.06466	11.18	50.57	1.7721
20.09.2012 01:21:59.750000	1375.03	2.06357	11.18	50.965	1.77481
20.09.2012 01:21:59.760000	1345.22	2.06232	11.18	51.75	1.77732
20.09.2012 01:21:59.770000	1325.1	2.06132	11.18	51.75	1.7807
20.09.2012 01:21:59.780000	1343.97	2.06382	11.18	52.42	1.78022
20.09.2012 01:21:59.790000	1376.15	2.06632	11.18	52.045	1.77859
20.09.2012 01:21:59.800000	1384.2	2.06749	11.18	51.98	1.77415
20.09.2012 01:21:59.810000	1390.66	2.06982	11.18	52.6	1.77053
20.09.2012 01:21:59.820000	1405.78	2.07132	11.17	52.42	1.76613
20.09.2012 01:21:59.830000	1446.24	2.07232	11.17	52.76	1.76366
20.09.2012 01:21:59.840000	1471.32	2.07232	11.17	52.76	1.76321
20.09.2012 01:21:59.850000	1441.69	2.07107	11.18	53.69	1.76331
20.09.2012 01:21:59.860000	1449.42	2.07016	11.18	53.79	1.7646
20.09.2012 01:21:59.870000	1441.15	2.06957	11.175	53.545	1.7682
20.09.2012 01:21:59.880000	1422.06	2.06699	11.17	53.3	1.77635
20.09.2012 01:21:59.890000	1420.72	2.06632	11.17	53.93	1.78078
20.09.2012 01:21:59.900000	1363.04	2.06299	11.1833	54.3567	1.78522
20.09.2012 01:21:59.910000	1361.05	2.06182	11.19	53.645	1.78573
20.09.2012 01:21:59.920000	1353.6	2.06282	11.19	52.7633	1.78425
20.09.2012 01:21:59.930000	1352.63	2.06432	11.19	52.85	1.78301
20.09.2012 01:21:59.940000	1353.35	2.06516	11.1933	52.6	1.77944
20.09.2012 01:21:59.950000	1388.77	2.06832	11.2	52.1	1.77443
20.09.2012 01:21:59.960000	1442.48	2.07132	11.2	51.5867	1.7723
20.09.2012 01:21:59.970000	1448.47	2.07332	11.21	51.73	1.76512
20.09.2012 01:21:59.980000	1456.35	2.07266	11.2067	51.4633	1.76268
20.09.2012 01:21:59.990000	1444.44	2.07157	11.2	50.93	1.76115
20.09.2012 01:22:00.000000	1428.57	2.06899	11.2	51.97	1.76303
20.09.2012 01:22:00.010000	1395.89	2.06732	11.19	52.25	1.76613
20.09.2012 01:22:00.020000	1397.9	2.06582	11.1833	53.3167	1.77159
20.09.2012 01:22:00.030000	1391.67	2.06432	11.18	53.85	1.77475
20.09.2012 01:22:00.040000	1382.78	2.06399	11.18	54.8367	1.77887
20.09.2012 01:22:00.050000	1369.58	2.06332	11.18	55.33	1.78074
20.09.2012 01:22:00.060000	1361.19	2.06349	11.1933	54.3433	1.78283
20.09.2012 01:22:00.070000	1367.05	2.06532	11.2	53.17	1.78282
20.09.2012 01:22:00.080000	1361.95	2.06632	11.2067	52.27	1.78141
20.09.2012 01:22:00.090000	1390.78	2.06757	11.21	51.44	1.77495
20.09.2012 01:22:00.100000	1400.32	2.07015	11.21	50.98	1.77114
20.09.2012 01:22:00.110000	1408.41	2.07057	11.21	50.82	1.76627
20.09.2012 01:22:00.120000	1426.41	2.07049	11.2	51.94	1.76223
20.09.2012 01:22:00.130000	1428.05	2.07082	11.2	51.94	1.76258
20.09.2012 01:22:00.140000	1435.23	2.06949	11.19	53.8833	1.76606
20.09.2012 01:22:00.150000	1402.99	2.06732	11.19	54.26	1.76837
20.09.2012 01:22:00.160000	1393.07	2.06682	11.19	54.88	1.77401
20.09.2012 01:22:00.170000	1370.37	2.06532	11.19	55.19	1.7797
20.09.2012 01:22:00.180000	1362.82	2.06399	11.21	54.93	1.78263
20.09.2012 01:22:00.190000	1352.63	2.06432	11.21	53.45	1.78888
20.09.2012 01:22:00.200000	1353.74	2.06332	11.2167	52.11	1.78923
20.09.2012 01:22:00.210000	1343.63	2.06482	11.23	51.13	1.78557
20.09.2012 01:22:00.220000	1366.36	2.06599	11.24	50.82	1.78278
20.09.2012 01:22:00.230000	1381.57	2.06782	11.24	49.74	1.77788
20.09.2012 01:22:00.240000	1420.51	2.07132	11.23	48.36	1.7716
20.09.2012 01:22:00.250000	1422.72	2.07232	11.23	48.36	1.76517
20.09.2012 01:22:00.260000	1446.16	2.07299	11.21	49.81	1.75616
20.09.2012 01:22:00.270000	1461.97	2.07132	11.21	50.36	1.75284
20.09.2012 01:22:00.280000	1443.58	2.07049	11.2067	51.5967	1.75179
20.09.2012 01:22:00.290000	1413.64	2.06807	11.2	52.97	1.75611
20.09.2012 01:22:00.300000	1393.82	2.06682	11.2	54.46	1.76135
20.09.2012 01:22:00.310000	1389.12	2.06507	11.2	54.515	1.77025
20.09.2012 01:22:00.320000	1355.49	2.06332	11.2	54.57	1.77898
20.09.2012 01:22:00.330000	1368.15	2.06282	11.2	54.35	1.78329
20.09.2012 01:22:00.340000	1350.33	2.06232	11.2	54.14	1.78814
20.09.2012 01:22:00.350000	1348.3	2.06282	11.21	54.51	1.78859
20.09.2012 01:22:00.360000	1347.74	2.06416	11.22	54.4767	1.78651
20.09.2012 01:22:00.370000	1351.73	2.06482	11.22	53.67	1.78388
20.09.2012 01:22:00.380000	1384.72	2.06766	11.2233	53.2867	1.77521
20.09.2012 01:22:00.390000	1382.57	2.07032	11.24	50.9	1.76036
20.09.2012 01:22:00.400000	1406.37	2.07066	11.24	50.9	1.75584
20.09.2012 01:22:00.410000	1446.35	2.07182	11.25	50.34	1.74841
20.09.2012 01:22:00.420000	1457.49	2.07182	11.2467	49.91	1.74703
20.09.2012 01:22:00.430000	1429.49	2.07007	11.235	50.095	1.74847
20.09.2012 01:22:00.440000	1420.74	2.06782	11.23	51.14	1.75268
20.09.2012 01:22:00.450000	1409.41	2.06632	11.22	52.13	1.75899
20.09.2012 01:22:00.460000	1382.94	2.06416	11.22	52.6167	1.77204
20.09.2012 01:22:00.470000	1386.12	2.06382	11.22	52.86	1.77789
20.09.2012 01:22:00.480000	1362.01	2.06266	11.2267	53.14	1.78587
20.09.2012 01:22:00.490000	1346.19	2.06182	11.23	52.95	1.78968
20.09.2012 01:22:00.500000	1323.84	2.06249	11.2267	53.0767	1.79068
20.09.2012 01:22:00.510000	1352.86	2.06582	11.22	53.33	1.78684
20.09.2012 01:22:00.520000	1376.52	2.06782	11.22	53.7167	1.78432
20.09.2012 01:22:00.530000	1412.4	2.07032	11.23	53.59	1.77625
20.09.2012 01:22:00.540000	1423.74	2.07149	11.2367	52.6833	1.77092
20.09.2012 01:22:00.550000	1431.13	2.07107	11.25	50.87	1.76386
20.09.2012 01:22:00.560000	1457.34	2.07082	11.25	49.4	1.75865
20.09.2012 01:22:00.570000	1446.27	2.06982	11.25	49.4	1.75768
20.09.2012 01:22:00.580000	1415.93	2.06765	11.2333	50.7167	1.75895
20.09.2012 01:22:00.590000	1397.87	2.06657	11.23	51.23	1.76026
20.09.2012 01:22:00.600000	1390.03	2.06499	11.23	51.3367	1.76435
20.09.2012 01:22:00.610000	1377.9	2.06432	11.23	51.39	1.76729
20.09.2012 01:22:00.620000	1379.76	2.06382	11.22	53.3333	1.77127
20.09.2012 01:22:00.630000	1371.93	2.06332	11.22	54.02	1.77525
20.09.2012 01:22:00.640000	1351.36	2.06299	11.2267	54.2467	1.77526
20.09.2012 01:22:00.650000	1358.05	2.06482	11.23	54.36	1.77377
20.09.2012 01:22:00.660000	1380.36	2.06632	11.24	50.96	1.77213
20.09.2012 01:22:00.670000	1400.11	2.06807	11.245	50.82	1.76918
20.09.2012 01:22:00.680000	1394.1	2.06932	11.25	50.5267	1.76442
20.09.2012 01:22:00.690000	1411.41	2.06932	11.25	50.45	1.76194
20.09.2012 01:22:00.700000	1415.1	2.06982	11.24	50.49	1.75978
20.09.2012 01:22:00.710000	1422.84	2.06957	11.24	50.775	1.75931
20.09.2012 01:22:00.720000	1412.82	2.06832	11.24	51.06	1.75965
20.09.2012 01:22:00.730000	1396.99	2.06682	11.23	53.61	1.76095
20.09.2012 01:22:00.740000	1383.3	2.06566	11.23	53.86	1.76509
20.09.2012 01:22:00.750000	1399.23	2.06532	11.23	53.33	1.76833
20.09.2012 01:22:00.760000	1390.95	2.06599	11.23	53.33	1.76992
20.09.2012 01:22:00.770000	1375.7	2.06532	11.245	52.915	1.77148
20.09.2012 01:22:00.780000	1370.66	2.06549	11.25	52.24	1.77135
20.09.2012 01:22:00.790000	1363.81	2.06632	11.255	51.68	1.77058
20.09.2012 01:22:00.800000	1379.02	2.06732	11.26	51.12	1.7687
20.09.2012 01:22:00.810000	1406.31	2.06782	11.26	50.89	1.76836
20.09.2012 01:22:00.820000	1400.17	2.06815	11.2533	50.9133	1.76628
20.09.2012 01:22:00.830000	1389.56	2.06782	11.24	51.54	1.76513
20.09.2012 01:22:00.840000	1377.38	2.06699	11.24	52.3833	1.76264
20.09.2012 01:22:00.850000	1383	2.06682	11.24	52.91	1.76092
20.09.2012 01:22:00.860000	1407.43	2.06732	11.2433	52.9333	1.76153
20.09.2012 01:22:00.870000	1397.45	2.06682	11.23	52.92	1.76319
20.09.2012 01:22:00.880000	1397.3	2.06716	11.23	52.92	1.76453
20.09.2012 01:22:00.890000	1386.9	2.06757	11.24	53.88	1.76696
20.09.2012 01:22:00.900000	1379.16	2.06749	11.2467	53.61	1.76721
20.09.2012 01:22:00.910000	1386.78	2.06707	11.26	53.07	1.76741
20.09.2012 01:22:00.920000	1392.78	2.06699	11.26	51.18	1.7666
20.09.2012 01:22:00.930000	1387.91	2.06732	11.25	50.98	1.76636
